# Supplementary material for: Structural basis for the inhibition of coronaviral main proteases by PF-00835231: Crystal structures of M pro and M pro mutants bound to PF-00835231
Source: PubMed Central journal article supplement (PMC11693862; doi:10.3724/abbs.2024122), 2024-07-29
Supplement: 2-Supplementary_Materials.pdf [file 2-Supplementary_Materials.pdf]

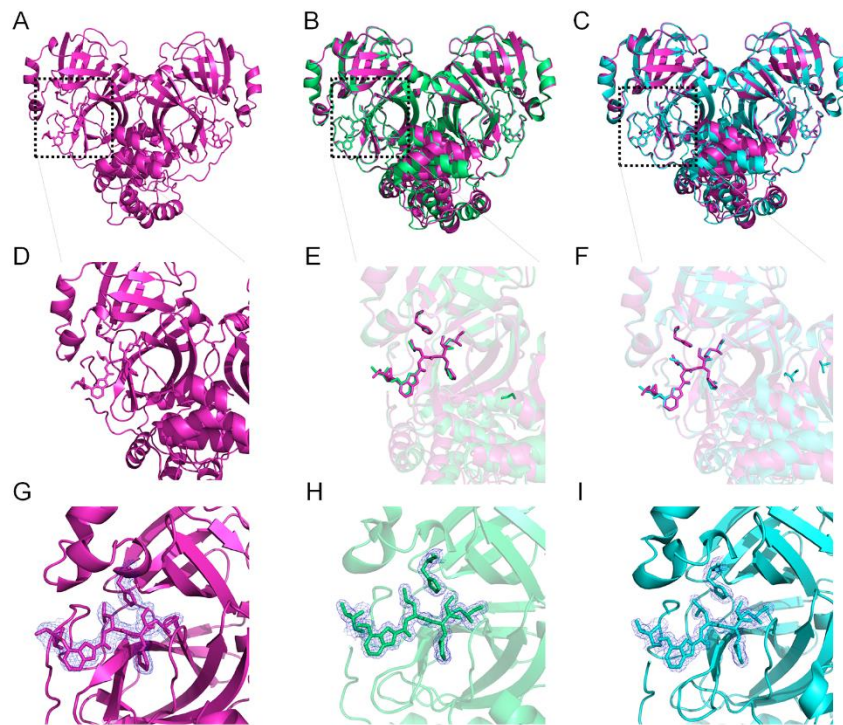

1  
2 **Supplementary Figure S1. Structural comparison between SARS-CoV-2**  
3 **M<sup>pro</sup>-PF-00835231 and available structures** (A) Structure of SARS-CoV-2  
4 M<sup>pro</sup>-PF-00835231. (B) Structural comparison between SARS-CoV-2  
5 M<sup>pro</sup>-PF-00835231 and SARS-CoV-2 M<sup>pro</sup>-PF-00835231 (PDB ID 6XHM, Lime  
6 green). (C) Structural comparison between SARS-CoV-2 M<sup>pro</sup>-PF-00835231 and  
7 SARS-CoV-2 M<sup>pro</sup>-PF-00835231 (PDB ID 8DSU, cyan). SARS-CoV-2  
8 M<sup>pro</sup>-PF-00835231 is shown as a cartoon with light magenta (this research), lime green  
9 (PDB ID 6XHM) and cyan (PDB ID 8DSU). (D–F) The zoomed-in view of the  
10 substrate binding pocket of the main proteases. PF-00835231 and its catalytic dyad  
11 residues are shown as sticks. (G) The *2Fo-Fc* electron density map (contoured at  $1.0\sigma$ )  
12 of the inhibitor and catalytic dyad residues His41, Cys145 and Thr190 in the  
13 SARS-CoV-2 M<sup>pro</sup>-PF-00835231 complex (this study) is shown as blue mesh. (H) The  
14 *2Fo-Fc* electron density map (contoured at  $1.0\sigma$ ) of the inhibitor and catalytic dyad  
15 residues His41, Cys145 and Thr190 in the SARS-CoV-2 M<sup>pro</sup>-PF-00835231 complex  
16 (PDB ID 6XHM) is shown as a blue mesh. (I) The *2Fo-Fc* electron density map  
17 (contoured at  $1.0\sigma$ ) of the inhibitor and catalytic dyad residues His41, Cys145 and  
18 Thr190 in the SARS-CoV-2 M<sup>pro</sup>-PF-00835231 complex (PDB ID 8DSU) is shown as  
19 a blue mesh.

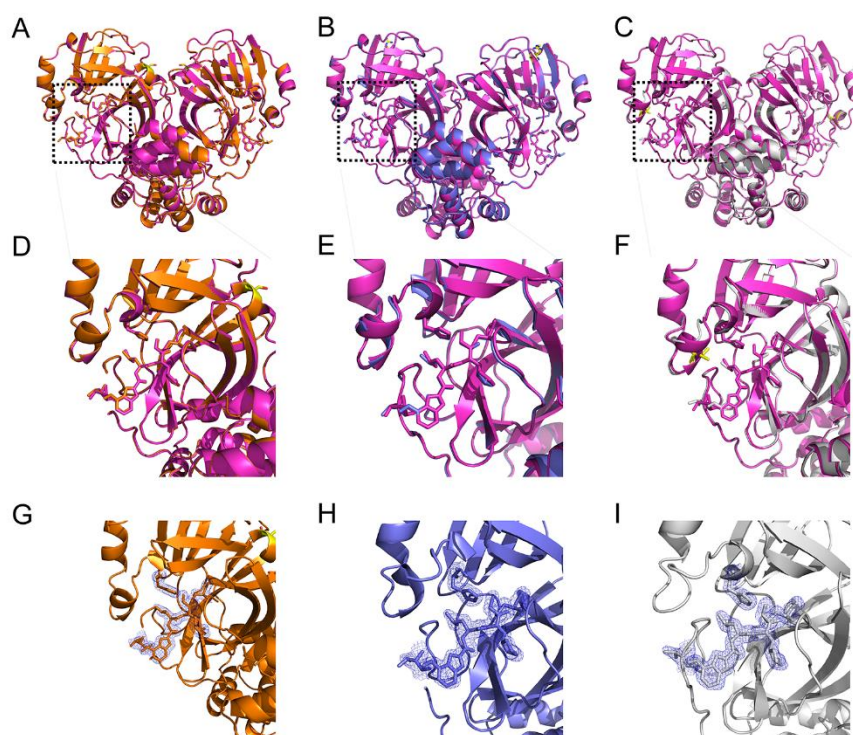

20

21 **Supplementary Figure S2. Structural comparison between SARS-CoV-2**  
 22 **M<sup>pro</sup>-PF-00835231 and the M<sup>pro</sup> mutants PF-00835231 (G15S, K90R and M49I).**  
 23 **S15, R90 and I49 are shown as yellow sticks** (A) Structural comparison between  
 24 SARS-CoV-2 M<sup>pro</sup>-PF-00835231 and G15S-PF-00835231. (B) Structural comparison  
 25 between SARS-CoV-2 M<sup>pro</sup>-PF-00835231 and M<sup>pro</sup> K90R-PF-00835231. (C)  
 26 Structural comparison between SARS-CoV-2 M<sup>pro</sup>-PF-00835231 and M<sup>pro</sup>  
 27 M49I-PF-00835231. (D–F) The zoomed-in view of the substrate binding pocket of  
 28 main proteases. PF-00835231 and catalytic dyad residues are shown as sticks. (G–H)  
 29 *2Fo-Fc* electron density maps of PF-00835231 bound to different SARS-CoV-2 M<sup>pro</sup>  
 30 mutants. *2Fo-Fc* electron density maps (blue) were constructed at 1 $\sigma$ . (G) The *2Fo-Fc*  
 31 electron density map of PF-00835231 bound to the G15S mutant. (H) The *2Fo-Fc*  
 32 electron density map of PF-00835231 bound to the K90R mutant. (I) The *2Fo-Fc*  
 33 electron density map of PF-00835231 bound to the M49I mutant.

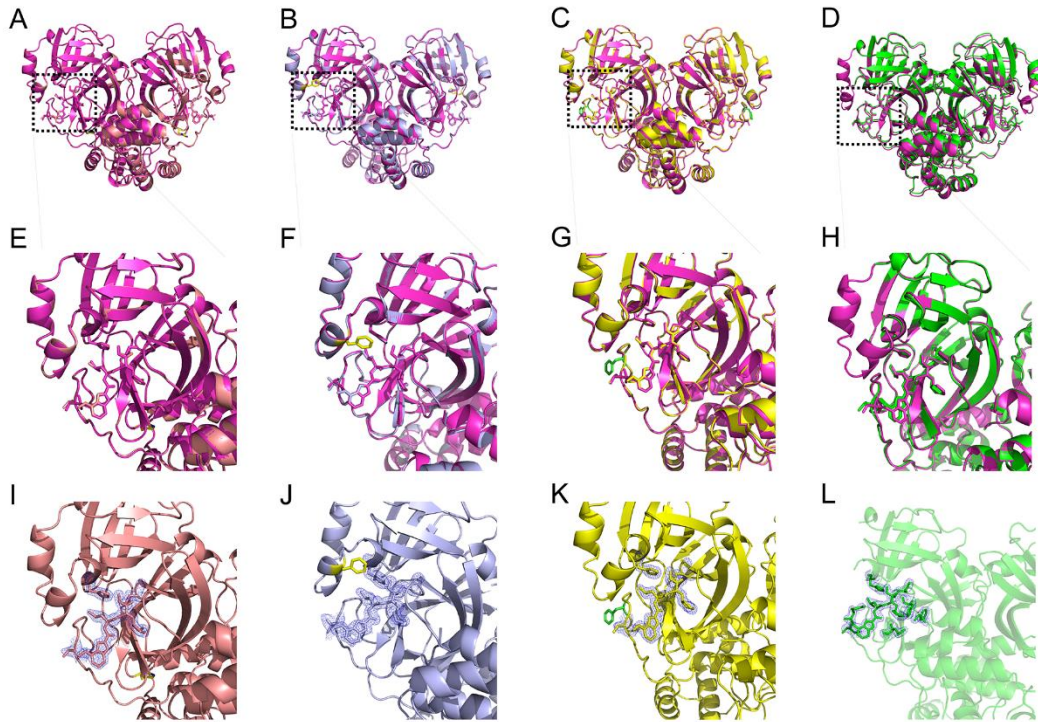

34

35 **Supplementary Figure S3. Structural comparison between SARS-CoV-2**  
 36 **M<sup>pro</sup>-PF-00835231 and the M<sup>pro</sup> mutant PF-00835231 (P132H, S46F, V186F and**  
 37 **Y54C). H132, F46 and C54 are shown as yellow sticks, while F186 is shown as**  
 38 **green sticks** (A) Structural comparison between SARS-CoV-2 M<sup>pro</sup>-PF-00835231  
 39 and P132H-PF-00835231. (B) Structural comparison between SARS-CoV-2  
 40 M<sup>pro</sup>-PF-00835231 and M<sup>pro</sup> S46F-PF-00835231. (C) Structural comparison between  
 41 SARS-CoV-2 M<sup>pro</sup>-PF-00835231 and M<sup>pro</sup> V186F-PF-00835231. (D) Structural  
 42 comparison between SARS-CoV-2 M<sup>pro</sup>-PF-00835231 and M<sup>pro</sup> Y54C-PF-00835231.  
 43 (E–H) The zoomed-in view of the substrate binding pocket of main proteases.  
 44 PF-00835231 and catalytic dyad residues are shown as sticks. (I–L) *2Fo-Fc* electron  
 45 density maps of PF-00835231 bound to different SARS-CoV-2 M<sup>pro</sup> mutants. *2Fo-Fc*  
 46 electron density maps (blue) were contoured at 1 $\sigma$ . (I) The *2Fo-Fc* electron density map  
 47 of PF-00835231 bound to the P132H mutant. (J) The *2Fo-Fc* electron density map of  
 48 PF-00835231 bound to the S46F mutant. (K) The *2Fo-Fc* electron density map of  
 49 PF-00835231 bound to the V186F mutant. (L) The *2Fo-Fc* electron density map of  
 50 PF-00835231 bound to the Y54C mutant.

51
